# Supplementary material for: Evaluation of Sample Size Influence on Chemical Characterization and In Vitro Antioxidant Properties of Flours Obtained from Mushroom Stems Coproducts
Source: MDPI journal article supplement (doi:10.3390/antiox13030349), 2024-03-14
Supplement: s1 [file s1]

# Development and characterization of a value-added product suitable for food applications from *Agaricus bisporus* and *Pleurotus ostreatus* stems: Evaluation of particle size influence and *in vitro* antioxidant activity

Patricia Bermúdez-Gómez<sup>1</sup>, J. Fernández-López<sup>2</sup>, Margarita Pérez-Clavijo<sup>1</sup>, M. Viuda-Martos<sup>2</sup>

<sup>1</sup> Centro Tecnológico de Investigación del Champiñón en La Rioja (CTICH), Carretera Calahorra, KM 4, 26560 Autol, La Rioja, Spain.

<sup>2</sup> IPOA Research Group, Agro-Food Technology Department, Escuela Politécnica Superior de Orihuela, Crta. Beniel km 3.2, Miguel Hernández University, 03300 Orihuela, Alicante, Spain

**Table S1.** Glucans composition of extracts of *Agaricus bisporus* stems flour (ABSF), and *Pleurotus ostreatus* stems flour (POSF).

| Sample           | Particle size (mm) | D-glucans                     | $\alpha$ -glucans             | $\beta$ -glucans              |
|------------------|--------------------|-------------------------------|-------------------------------|-------------------------------|
| ABSF<br>extracts | L                  | 11.53 $\pm$ 0.14 <sup>e</sup> | 8.63 $\pm$ 0.21 <sup>c</sup>  | 2.90 $\pm$ 0.35 <sup>f</sup>  |
|                  | LI                 | 11.51 $\pm$ 0.73 <sup>e</sup> | 5.70 $\pm$ 0.23 <sup>d</sup>  | 5.81 $\pm$ 0.51 <sup>de</sup> |
|                  | SI                 | 8.92 $\pm$ 0.22 <sup>f</sup>  | 4.15 $\pm$ 0.06 <sup>d</sup>  | 4.77 $\pm$ 0.28 <sup>ef</sup> |
|                  | S                  | 8.76 $\pm$ 0.05 <sup>f</sup>  | 4.70 $\pm$ 0.06 <sup>d</sup>  | 4.05 $\pm$ 0.04 <sup>ef</sup> |
| POSF<br>extracts | L                  | 22.54 $\pm$ 1.94 <sup>d</sup> | 14.45 $\pm$ 1.55 <sup>b</sup> | 8.09 $\pm$ 0.69 <sup>d</sup>  |
|                  | LI                 | 30.24 $\pm$ 0.89 <sup>c</sup> | 15.32 $\pm$ 0.94 <sup>a</sup> | 14.92 $\pm$ 1.59 <sup>c</sup> |
|                  | SI                 | 36.63 $\pm$ 0.19 <sup>b</sup> | 16.95 $\pm$ 1.00 <sup>a</sup> | 19.68 $\pm$ 0.82 <sup>b</sup> |
|                  | S                  | 41.33 $\pm$ 0.38 <sup>a</sup> | 12.52 $\pm$ 1.17 <sup>b</sup> | 28.81 $\pm$ 1.53 <sup>a</sup> |

Results are reported as mean  $\pm$  SD (n = 3). Mean values within rows followed by different superscript letters (a-f) are significantly different when subjected to Tukey's test (p < 0.05). L — >0.510 mm; LI 274 — 0.510-0.315 mm; SI—0.315-0.180 mm; S — <0.180 mm. Values are expressed as g/100 g of extract.
